# Supplementary material for: Loss of Polycomb Repressive Complex 2 Function Alters Digestive Organ Homeostasis and Neuronal Differentiation in Zebrafish
Source: MDPI journal article supplement (doi:10.3390/cells10113142), 2021-11-12

Figure S1: Uncropped RT-PCR gels used in Figure 1

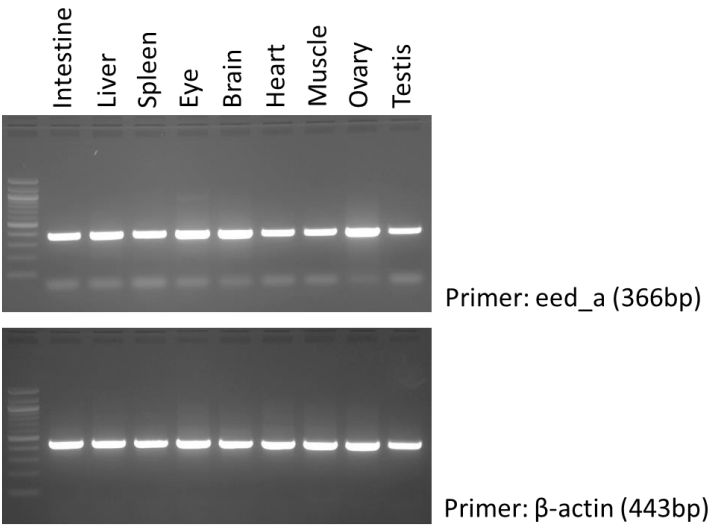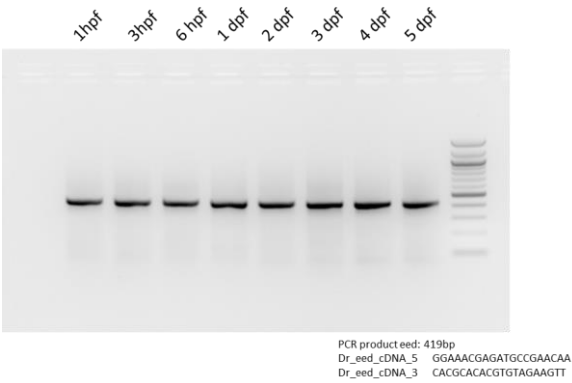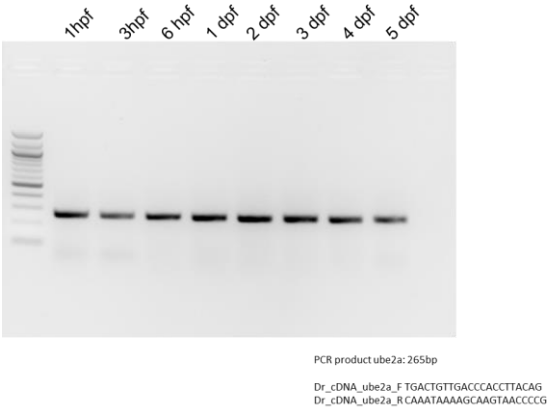

**Figure S2: Uncropped Western blots used in Figure 3.** After genotyping of the caudal extremity of larvae, 10 to 15  $\mu$ g of bulk histones from a pool of 10 *eed*<sup>+/+</sup> or *eed*<sup>-/-</sup> siblings at 9 dpf were analyzed by Western blot using specific antibodies recognizing H3K27me3, H3K27me2, H3K27me1, H2AK119ub, H3K27ac, H3K9me3 or H4K20me3 (Blots at the left side). After stripping, the membranes were reprobed with an anti-histone H3 as a control (Blots at the left side).

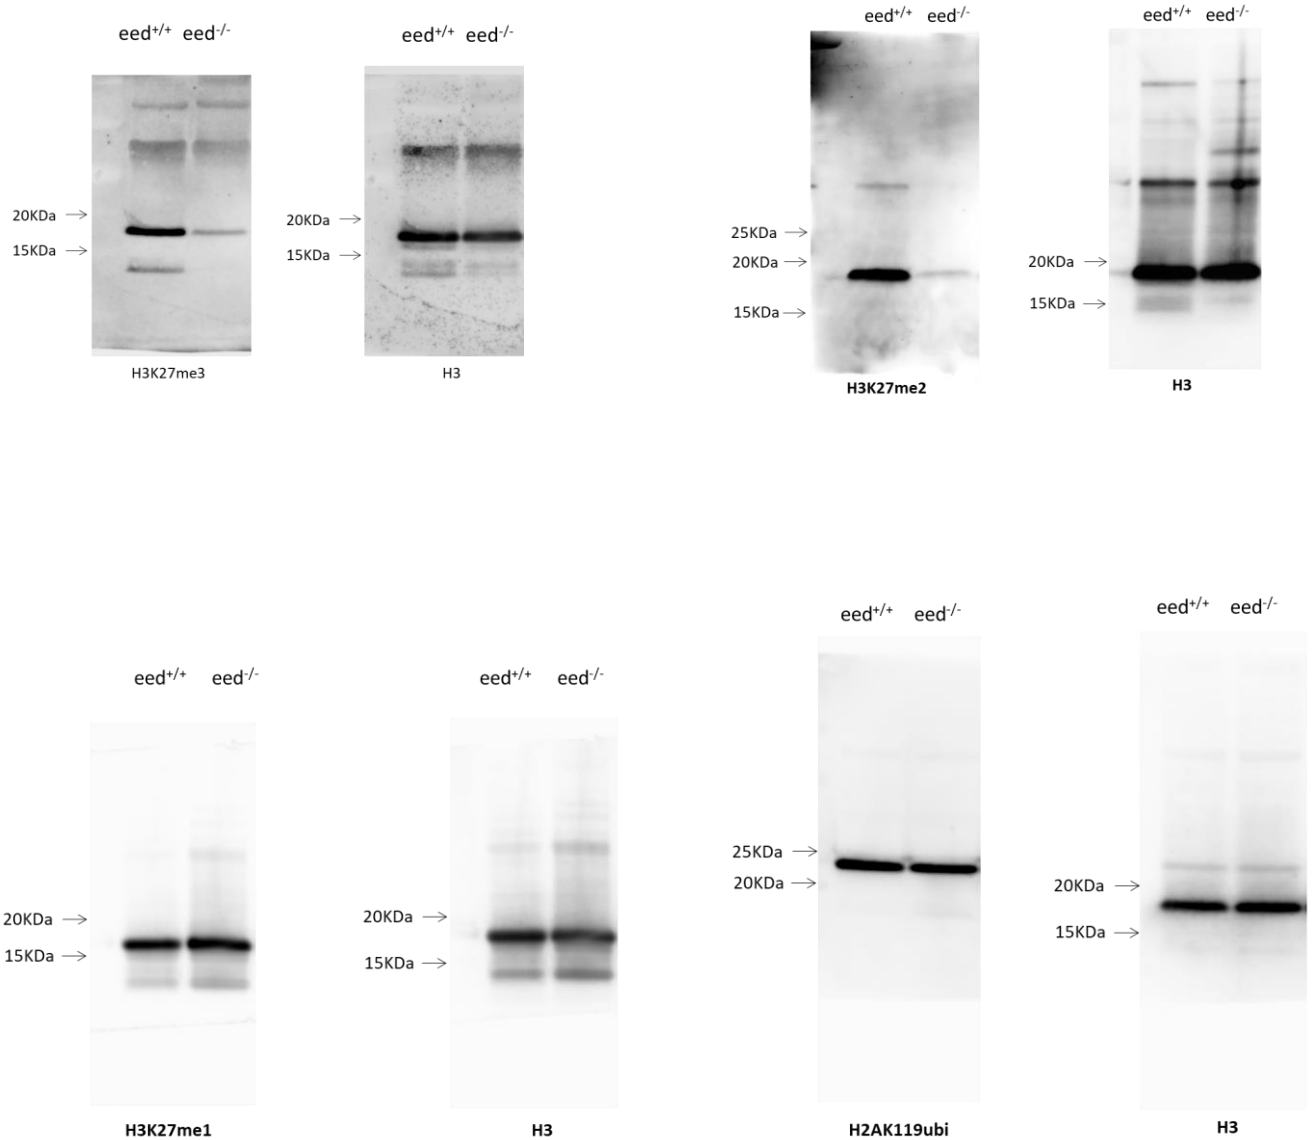

**Figure S2: Uncropped Western blots used in Figure 3 (continued)**

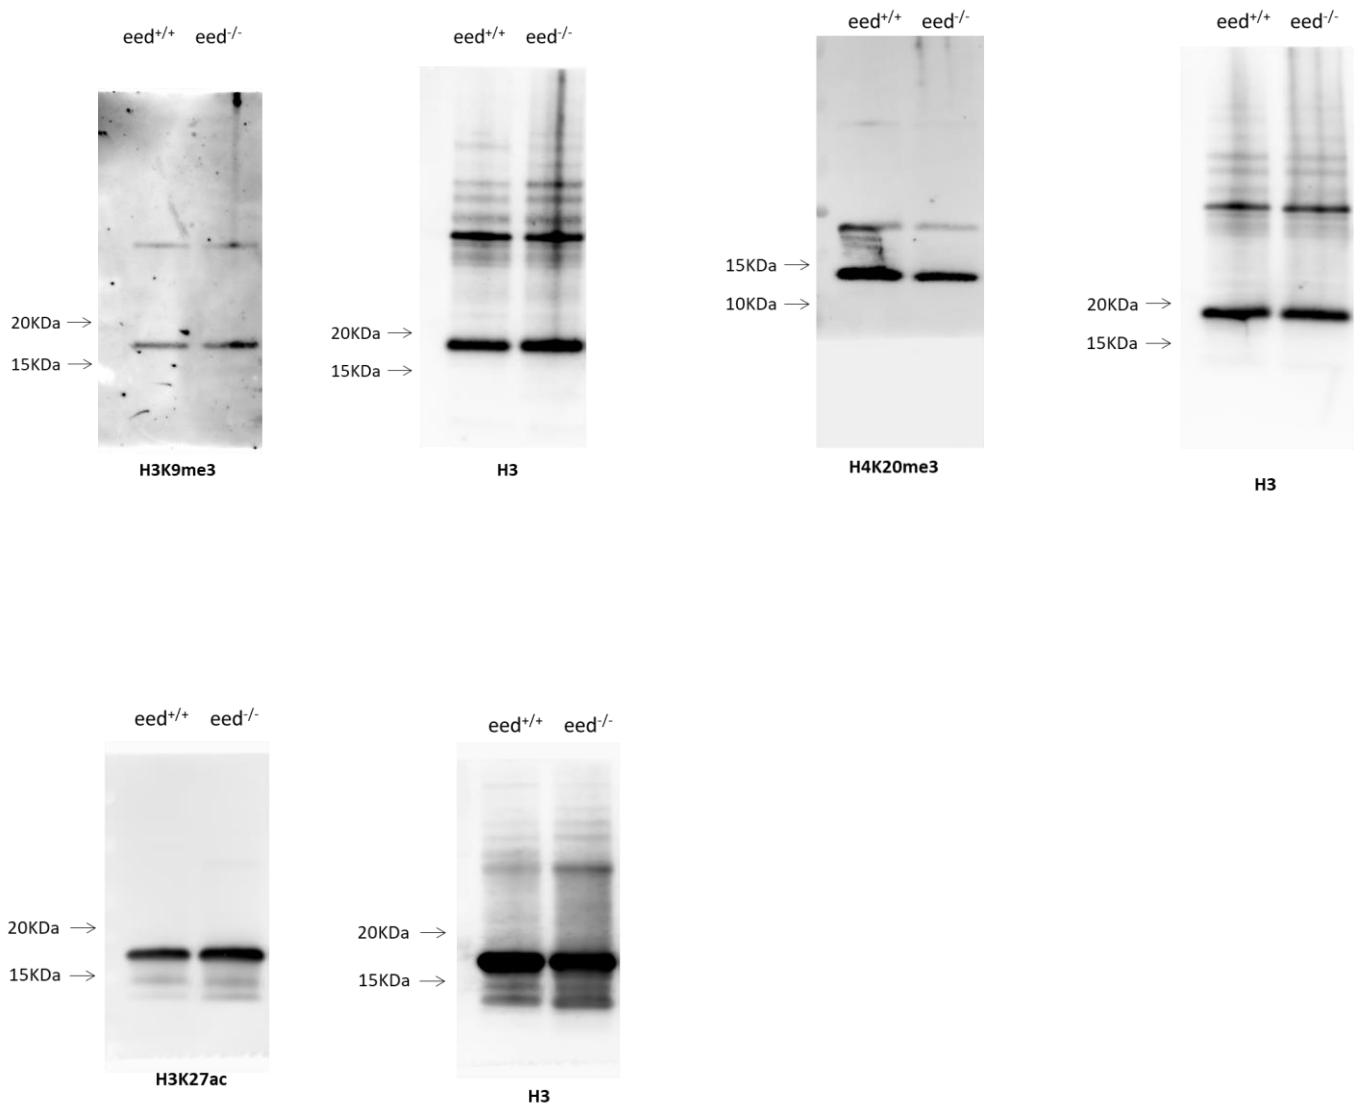

Supplement: s1 [file s1]
